# Supplementary material
Source: Research Square preprint supplement (doi:10.21203/rs.3.rs-9111901/v1)
Supplement: Supplementary file 1 [file 25deec01f01f3c9f1257d3a4.pdf]

## SUPPORTING INFORMATION

### ***Elliptochloris*, not *Coccomyxa*, is the photobiont of three lichenized *Multiclavula* species collected in Japan**

Hiroshi Masumoto, Shinji Handa, Chihiro Tanaka & Yousuke Degawa

**Appendix S2.** GenBank accession numbers of the DNA sequences used in this study. The sequences registered in this study are shown in bold.

| <b>Taxon</b>                     | <b>Strain</b>           | <b>Locality</b> | <b>Isolation source</b>                           | <b>18S rDNA</b> | <b>ITS2</b> | <b><i>rbcL</i></b> |
|----------------------------------|-------------------------|-----------------|---------------------------------------------------|-----------------|-------------|--------------------|
| <i>Coccomyxa dispar</i>          | SAG 49.84               | Germany         | basidiolichen ( <i>Multiclavula vernalis</i> )    | HG972998        | HG972998    | JF502549           |
| <i>Coccomyxa subellipsoidea</i>  | SAG 216-7               | Finland         | basidiolichen ( <i>Botrydina vulgaris</i> )       | HG972976        | HG972976    | JF502548           |
| <i>Elliptochloris antarctica</i> | SAG 62.90 <sup>T</sup>  | Antarctica      | cryptoendolithic                                  | HG972970        | HG972970    | HQ317294           |
| <i>Elliptochloris antarctica</i> | SAG 2200                | Japan           | on tombstone                                      | LT560355        | LT560355    | –                  |
| <i>Elliptochloris bilobata</i>   | SAG 245.80 <sup>T</sup> | Austria         | ascolichen ( <i>Catolechia wahlenbergii</i> )     | HG972969        | HG972969    | FJ217379           |
| <i>Elliptochloris reniformis</i> | CAUP H7102 <sup>T</sup> | Japan: Nara     | soil                                              | LT560354        | LT560354    | <b>LC*****</b>     |
| <i>Elliptochloris marina</i>     | ZC101                   | USA: Washington | sea anemone ( <i>Anthopleura xanthogrammica</i> ) | FJ217363        | –           | FJ217368           |

|                                     |                       |                                   |                                                                     |                 |                 |                 |
|-------------------------------------|-----------------------|-----------------------------------|---------------------------------------------------------------------|-----------------|-----------------|-----------------|
| <i>Elliptochloris marina</i>        | ZC102                 | USA: Alaska                       | sea anemone ( <i>Anthopleura xanthogrammica</i> )                   | FJ217366        | –               | FJ217369        |
| <i>Elliptochloris marina</i>        | ZC103                 | USA: Oregon                       | sea anemone ( <i>Anthopleura xanthogrammica</i> )                   | FJ217362        | JF913551        | FJ217375        |
| <i>Elliptochloris marina</i>        | ZC104                 | USA: Alaska                       | sea anemone ( <i>Anthopleura xanthogrammica</i> )                   | FJ217359        | –               | FJ217370        |
| <i>Elliptochloris marina</i>        | ZC114                 | USA: Washington                   | sea anemone ( <i>Anthopleura elegantissima</i> )                    | FJ217358        |                 | FJ217378        |
| <i>Elliptochloris marina</i>        | ZC141                 | USA: Washington                   | sea anemone ( <i>Anthopleura xanthogrammica</i> )                   | FJ217365        |                 | FJ217373        |
| <i>Elliptochloris parasphaerica</i> | S-253-PPSC-004        | Japan: Mt. Nekomake, Ueda, Nagano | basidiolichen ( <i>Multiclavula vernalis</i> ; GMNHJ-<br>FF1008191) | <b>LC660152</b> | <b>LC660436</b> | <b>LC660407</b> |
|                                     | NIES-4523             |                                   |                                                                     |                 |                 |                 |
| <i>Elliptochloris parasphaerica</i> | (=S-253-PPSC-<br>007) | Japan: Mt. Nekomake, Ueda, Nagano | basidiolichen ( <i>Multiclavula vernalis</i> ; GMNHJ-<br>FF1008191) | <b>LC597448</b> | <b>LC597447</b> | <b>LC597449</b> |
| <i>Elliptochloris parasphaerica</i> | S-253-PPSC-008        | Japan: Mt. Nekomake, Ueda, Nagano | basidiolichen ( <i>Multiclavula vernalis</i> ; GMNHJ-<br>FF1008191) | <b>LC660153</b> | <b>LC660437</b> | <b>LC660408</b> |

|                                     |                              |                                     |                                                                  |                 |                 |                 |
|-------------------------------------|------------------------------|-------------------------------------|------------------------------------------------------------------|-----------------|-----------------|-----------------|
| <i>Elliptochloris parasphaerica</i> | S-253-PPSC-009               | Japan: Mt. Nekodake, Ueda, Nagano   | basidiolichen ( <i>Multiclavula vernalis</i> ; GMNHJ-FF1008191)  | <b>LC660154</b> | –               | <b>LC660409</b> |
| <i>Elliptochloris parasphaerica</i> | NIES-4524<br>(=S-356-PL-003) | Japan: Katashima, Gunma             | basidiolichen ( <i>Multiclavula petricola</i> ; GMNHJ-FF1008198) | <b>LC660155</b> | <b>LC660438</b> | <b>LC660410</b> |
| <i>Elliptochloris parasphaerica</i> | S-356-PL-004                 | Japan: Katashima, Gunma             | basidiolichen ( <i>Multiclavula petricola</i> ; GMNHJ-FF1008198) | <b>LC660156</b> | <b>LC660439</b> | <b>LC660411</b> |
| <i>Elliptochloris parasphaerica</i> | S-356-PL-005                 | Japan: Katashima, Gunma             | basidiolichen ( <i>Multiclavula petricola</i> ; GMNHJ-FF1008198) | <b>LC660157</b> | –               | <b>LC660412</b> |
| <i>Elliptochloris parasphaerica</i> | S-356-PL-008                 | Japan: Katashima, Gunma             | basidiolichen ( <i>Multiclavula petricola</i> ; GMNHJ-FF1008198) | <b>LC660158</b> | –               | <b>LC660413</b> |
| <i>Elliptochloris perforata</i>     | CAUP H7103                   | Indonesia: Cibodas Botanical Garden | bark ( <i>Cleistocalyx operculata</i> )                          | LT560341        | LT560341        | KM462887        |
| <i>Elliptochloris perforata</i>     | SAG 2201                     | Japan: Shizuoka                     | tombstone                                                        | LT560342        | LT560342        | FJ217381        |
| <i>Elliptochloris perforata</i>     | SAG 2509 <sup>T</sup>        | Ukraine                             | ascolichen ( <i>Micarea prasina</i> )                            | LT560343        | LT560343        | –               |

|                                    |                       |                                        |                                                           |                 |          |                 |
|------------------------------------|-----------------------|----------------------------------------|-----------------------------------------------------------|-----------------|----------|-----------------|
| <i>Elliptochloris subsphaerica</i> | SAG 2117              | Germany                                | rooftile                                                  | LT560351        | LT560351 | FJ217380        |
| <i>Elliptochloris subsphaerica</i> | SAG 2202 <sup>T</sup> | Japan: Hiroshima                       | bark                                                      | LT560349        | LT560349 | FJ217382        |
| <i>Elliptochloris subsphaerica</i> | CCAP 211/56           | Antarctica                             | soil                                                      | LT560345        | LT560345 | –               |
| <i>Elliptochloris subsphaerica</i> | CAUP H7101            | Japan: Kyoto                           | soil                                                      | LT560348        | LT560348 | –               |
| <i>Elliptochloris subsphaerica</i> | EL-1                  | Ukraine                                | soil                                                      | LT560344        | LT560344 | –               |
| <i>Elliptochloris subsphaerica</i> | EL-2                  | Germany                                | bark                                                      | LT560347        | LT560347 | –               |
| <i>Elliptochloris subsphaerica</i> | EL-3                  | Austria                                | limestone                                                 | LT560350        | LT560350 | –               |
| <i>Elliptochloris subsphaerica</i> | EL-4                  | Germany                                | bark                                                      | LT560352        | LT560352 | –               |
| <i>Elliptochloris subsphaerica</i> | EL-5                  | Germany                                | bark                                                      | LT560353        | LT560353 | –               |
| <i>Elliptochloris subsphaerica</i> | EL-6                  | Germany                                | bark                                                      | LT560346        | LT560346 | –               |
| <i>Elliptochloris subsphaerica</i> | S-200-PL-001          | Japan: Mt. Daimonji, Sakyo Ward, Kyoto | basidiolichen ( <i>Multiclavula mucida</i> ; OSA-MY-9325) | <b>LC660159</b> | –        | <b>LC660414</b> |

|                                    |                              |                                        |                                                               |                 |                 |                 |
|------------------------------------|------------------------------|----------------------------------------|---------------------------------------------------------------|-----------------|-----------------|-----------------|
| <i>Elliptochloris subsphaerica</i> | NIES-4525<br>(=S-200-PL-009) | Japan: Mt. Daimonji, Sakyo Ward, Kyoto | basidiolichen ( <i>Multiclavula mucida</i> ; OSA-MY-9325)     | <b>LC660160</b> | <b>LC660440</b> | <b>LC660415</b> |
| <i>Elliptochloris subsphaerica</i> | S-200-PL-015A                | Japan: Mt. Daimonji, Sakyo Ward, Kyoto | basidiolichen ( <i>Multiclavula mucida</i> ; OSA-MY-9325)     | <b>LC660161</b> | <b>LC660441</b> | <b>LC660416</b> |
| <i>Elliptochloris subsphaerica</i> | S-208-PL-005                 | Japan: Mt. Arikasa, Nakanojo, Gunma    | basidiolichen ( <i>Multiclavula mucida</i> ; GMNHJ-FF1008189) | <b>LC660162</b> | –               | <b>LC660417</b> |
| <i>Elliptochloris subsphaerica</i> | S-208-PL-009                 | Japan: Mt. Arikasa, Nakanojo, Gunma    | basidiolichen ( <i>Multiclavula mucida</i> ; GMNHJ-FF1008189) | <b>LC660163</b> | –               | <b>LC660418</b> |
| <i>Elliptochloris subsphaerica</i> | S-208-PL-019                 | Japan: Mt. Arikasa, Nakanojo, Gunma    | basidiolichen ( <i>Multiclavula mucida</i> ; GMNHJ-FF1008189) | <b>LC660164</b> | –               | <b>LC660419</b> |
| <i>Elliptochloris subsphaerica</i> | S-216-PL-004                 | Japan: Lake Sugawa, Ueda, Nagano       | basidiolichen ( <i>Multiclavula mucida</i> ; GMNHJ-FF1008190) | <b>LC660165</b> | –               | <b>LC660420</b> |

|                                    |                              |                                      |                                                               |                 |                 |                 |
|------------------------------------|------------------------------|--------------------------------------|---------------------------------------------------------------|-----------------|-----------------|-----------------|
| <i>Elliptochloris subsphaerica</i> | S-216-PL-021                 | Japan: Lake Sugawa, Ueda, Nagano     | basidiolichen ( <i>Multiclavula mucida</i> ; GMNHJ-FF1008190) | <b>LC660166</b> | –               | <b>LC660421</b> |
| <i>Elliptochloris subsphaerica</i> | S-278-PL-001                 | Japan: Otari, Nagano                 | basidiolichen ( <i>Multiclavula mucida</i> ; GMNHJ-FF1008193) | <b>LC660167</b> | –               | <b>LC660422</b> |
| <i>Elliptochloris subsphaerica</i> | S-278-PL-002                 | Japan: Otari, Nagano                 | basidiolichen ( <i>Multiclavula mucida</i> ; GMNHJ-FF1008193) | <b>LC660168</b> | –               | <b>LC660423</b> |
| <i>Elliptochloris subsphaerica</i> | S-279-PL-001                 | Japan: Kumorizawa, Naganohara, Gunma | basidiolichen ( <i>Multiclavula mucida</i> ; GMNHJ-FF1008194) | <b>LC660169</b> | –               | <b>LC660424</b> |
| <i>Elliptochloris subsphaerica</i> | S-280-PL-001                 | Japan: Tambarakogen, Numata, Gunma   | basidiolichen ( <i>Multiclavula mucida</i> ; GMNHJ-FF1008195) | <b>LC660170</b> | –               | <b>LC660425</b> |
| <i>Elliptochloris subsphaerica</i> | NIES-4526<br>(=Handa-3562-e) | Japan: Hiroshima                     | concrete                                                      | <b>LC660171</b> | <b>LC660442</b> | <b>LC660426</b> |
| <i>Elliptochloris subsphaerica</i> | Handa-3580-k                 | Japan: Hiroshima                     | bark ( <i>Symplocos glauca</i> )                              | <b>LC660172</b> | <b>LC660443</b> | <b>LC660427</b> |

|                                    |                              |                  |                                                 |                 |                 |                 |
|------------------------------------|------------------------------|------------------|-------------------------------------------------|-----------------|-----------------|-----------------|
| <i>Elliptochloris subsphaerica</i> | NIES-4527<br>(=Handa-3722-b) | Japan: Hiroshima | wooden fence                                    | <b>LC660173</b> | –               | <b>LC660428</b> |
| <i>Elliptochloris subsphaerica</i> | NIES-4528<br>(=Handa-3935-e) | Japan: Oita      | stone                                           | <b>LC660174</b> | –               | <b>LC660429</b> |
| <i>Elliptochloris subsphaerica</i> | Handa-3965B-a                | Japan: Hiroshima | stone                                           | <b>LC660175</b> | –               | <b>LC660430</b> |
| <i>Elliptochloris subsphaerica</i> | NIES-4529<br>(=Handa-3968-a) | Japan: Kyoto     | basidiolichen ( <i>Multiclavula mucida</i> )    | <b>LC660176</b> | –               | <b>LC660431</b> |
| <i>Elliptochloris subsphaerica</i> | NIES-4530<br>(=Handa-4057-a) | Japan: Hiroshima | bark ( <i>Zelkova serrata</i> )                 | <b>LC660177</b> | <b>LC660444</b> | <b>LC660432</b> |
| <i>Elliptochloris subsphaerica</i> | Handa-4075-f                 | Japan: Hiroshima | bark ( <i>Cerasus</i> × <i>yedoensis</i> )      | <b>LC660178</b> | –               | <b>LC660433</b> |
| <i>Elliptochloris subsphaerica</i> | NIES-4531<br>(=Handa-4105-b) | Japan: Hiroshima | bark ( <i>Cerasus</i> × <i>yedoensis</i> )      | <b>LC660179</b> | –               | <b>LC660434</b> |
| <i>Elliptochloris subsphaerica</i> | NIES-4532                    | Japan: Kumamoto  | basidiolichen ( <i>Bryoclavula phycophila</i> ) | <b>LC660180</b> | <b>LC660445</b> | <b>LC660435</b> |

---

(=Handa-S-293-c)

---
