# Supplementary material
Source: Research Square preprint supplement (doi:10.21203/rs.3.rs-9111901/v1)
Supplement: Supplementary file 3 [file b5b9ccc1952a4b54225edea3.pdf]

## SUPPORTING INFORMATION

### *Elliptochloris*, not *Coccomyxa*, is the photobiont of three lichenized *Multiclavula* species collected in Japan

Hiroshi Masumoto, Shinji Handa, Chihiro Tanaka & Yousuke Degawa

#### Appendix S1. Primers used in PCR and sequencing reactions in this study.

| Locus amplified                                                                          | Primer name             | Primer sequences (5'-3')   | Type            | References             |
|------------------------------------------------------------------------------------------|-------------------------|----------------------------|-----------------|------------------------|
| Nuclear small subunit<br>ribosomal DNA (18S rDNA)                                        | EAF3                    | TCGACAATCTGGTTGATCCTGCCAG  | PCR, sequencing | Marin et al. (2003)    |
|                                                                                          | E528F                   | TGCCAGCAGCYGCGGTAATTCCAGC  | Sequencing      | Marin et al. (2003)    |
|                                                                                          | NS1680schizF            | ATTAAGAGGGACAGTCGGGGGC     | Sequencing      | Muggia et al. (2011)   |
|                                                                                          | ITS1T-fw-Elliptochloris | GGGTAATCTTGCAAACCGCATC     | Sequencing      | This study             |
|                                                                                          | 536R                    | GWATTACCGCGGCKGCTG         | Sequencing      | Marin et al. (2003)    |
|                                                                                          | N920R                   | TTCCGTCAATTCCTTTRAGTTTC    | Sequencing      | Darienko et al. (2019) |
|                                                                                          | BR                      | TTGATCCTTCTGCAGGTTACCTAC   | Sequencing      | Marin et al. (1998)    |
|                                                                                          | ITS055R                 | CTCCTTGGTCCGTGTTTCAAGACGGG | PCR, sequencing | Marin et al. (1998)    |
| Internal transcribed spacer 2<br>(ITS2)                                                  | ITS3                    | GCATCGATGAAGAACGCAGC       | PCR, sequencing | White et al. (1990)    |
|                                                                                          | ITS055R                 | CTCCTTGGTCCGTGTTTCAAGACGGG | PCR, sequencing | Marin et al. (1998)    |
| ribulose-1,5-bisphosphate<br>carboxylase/oxygenase large<br>subunit gene ( <i>rbcL</i> ) | rbcL-GA1F               | ATGGCTCCACAACTGAAAC        | PCR, sequencing | This study             |
|                                                                                          | rbcL-EL564F             | TCYGCNAAAACTATGGTCGTGC     | Sequencing      | This study             |
|                                                                                          | rbcL-GA1313R            | ATCACATCACCACCTTCACGAGC    | PCR, sequencing | This study             |

## References

- Darienko T, Rad-Menéndez C, Campbell C, Pröschold T (2019) Are there any true marine *Chlorella* species? Molecular phylogenetic assessment and ecology of marine *Chlorella*-like organisms, including a description of *Droopiella* gen. nov. *Syst Biodivers* 17: 811–829
- Marin B, Klingberg M, Melkonian M (1998) Phylogenetic relationships among the Cryptophyta: analyses of nuclear-encoded SSU rRNA sequences support the monophyly of extant plastid-containing lineages. *Protist* 149: 265–276
- Marin B, Palm A, Klingberg M, Melkonian M (2003) Phylogeny and taxonomic revision of plastid-containing euglenophytes based on SSU rDNA sequence comparisons and synapomorphic signatures in the SSU rRNA secondary structure. *Protist* 154: 99–145
- Muggia L, Baloch E, Stabentheiner E, Grube M, Wedin M (2011) Photobiont association and genetic diversity of the optionally lichenized fungus *Schizoxylon albescens*. *FEMS Microbiol Ecol* 75: 255–272
- White TJ, Bruns T, Lee S, Taylor J (1990) Amplification and direct sequencing of fungal ribosomal RNA genes for phylogenetics. In: Innis MA, Gelfand DH, Sninsky JJ, White TJ (eds) *PCR protocols: a guide to methods and applications*. Academic Press, San Diego, pp 315–322
